# Supplementary material
Source: PubMed Central journal article supplement (PMC7880874)
Supplement: NIHMS1648424-supplement-mmc1.pdf [file NIHMS1648424-supplement-mmc1.pdf]

# Supplemental Figure 1

**A**

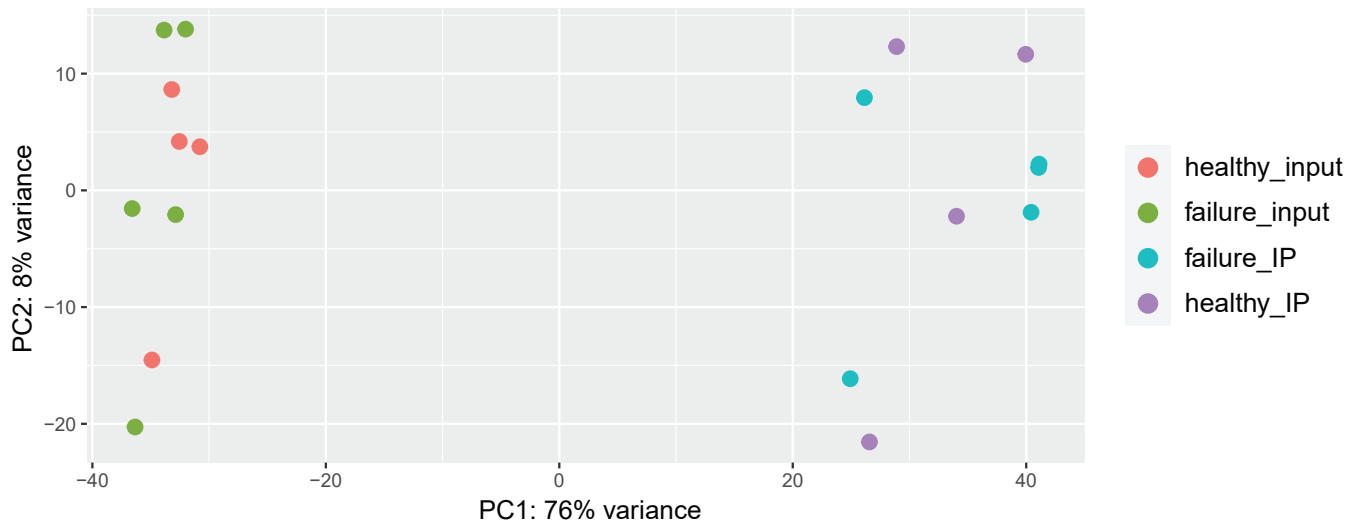

**B**

**Non-Failing**

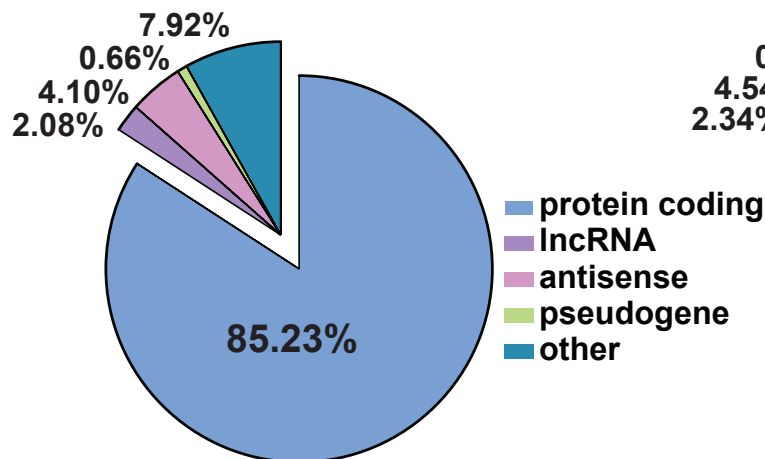

**B'**

**Failing**

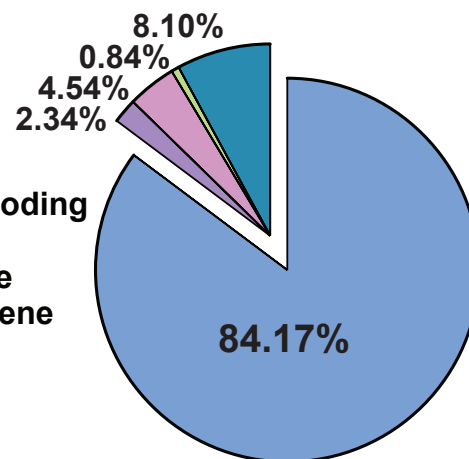

**Supplemental Figure 1. Principal component analysis of human heart RNA-seq samples and RNA subtype of predicted m<sup>6</sup>A peaks.** (A) Principal component analysis of top 500 enriched transcripts from non-failing and failing human heart RNA samples, including both input RNA and m<sup>6</sup>A-IP RNA samples. (B) Pie charts outlining RNA subtypes found to have detected m<sup>6</sup>A peaks and their percent make-up in regard to total detected peaks in either (B) non-failing or (B') failing human heart RNA samples.

# Supplemental Figure 2

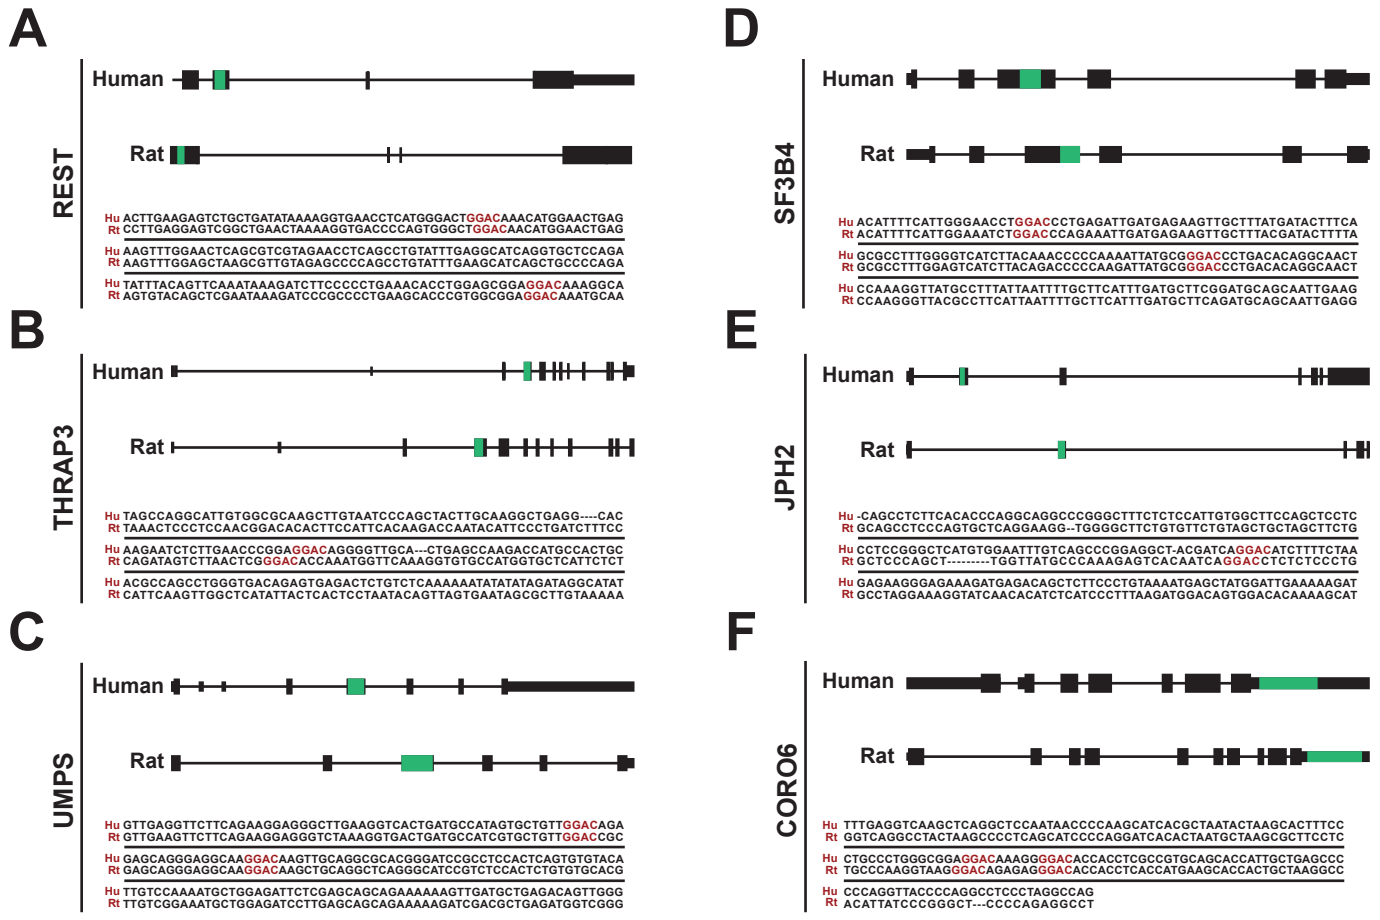

**Supplemental Figure 2. Sequence of m<sup>6</sup>A peaks differentially regulated with stress and conserved between human heart and rat cardiomyocytes.** (A-F) Human and rat gene schematic (top) are shown to display the location of the m<sup>6</sup>A peaks in each gene (green) for transcripts that have GGAC motifs (m<sup>6</sup>A consensus sequence, red) in conserved gene locations. Human sequence is labeled as 'Hu', while rat sequence is labeled as 'Rt'.

# Supplemental Table 1

Gene ontology (GO) analysis of transcripts with m<sup>6</sup>A peak enrichment determined by exomePeak analysis in human failing or non-failing RNA samples. Red indicates an overlap in GO category when using either total transcriptome (left) or heart-specific transcriptome (right) as background.

| Failing                                                                  |             |             |                                                            |             |             |
|--------------------------------------------------------------------------|-------------|-------------|------------------------------------------------------------|-------------|-------------|
| Molecular Function                                                       |             |             |                                                            |             |             |
| <i>Total Background</i>                                                  |             |             | <i>Heart Background</i>                                    |             |             |
| Description                                                              | Enrichment  | FDR         | Description                                                | Enrichment  | FDR         |
| <b>histone methyltransferase activity (H3-K4 specific)</b>               | 11.17158177 | 0.025194751 | <b>histone methyltransferase activity (H3-K4 specific)</b> | 10.20824479 | 0.056103994 |
| microtubule plus-end binding                                             | 10.5144299  | 0.025194751 | <b>histone-lysine N-methyltransferase activity</b>         | 5.954809463 | 0.036162688 |
| alpha-actinin binding                                                    | 7.207472109 | 0.001616646 | <b>protein kinase A binding</b>                            | 5.27812657  | 0.053706088 |
| ubiquitin conjugating enzyme binding                                     | 7.207472109 | 0.018755669 | <b>N-methyltransferase activity</b>                        | 4.683782905 | 0.008617622 |
| <b>histone-lysine N-methyltransferase activity</b>                       | 6.951206434 | 0.011722831 | <b>histone methyltransferase activity</b>                  | 4.644751381 | 0.056103994 |
| <b>protein kinase A binding</b>                                          | 6.516756032 | 0.011263632 | protein methyltransferase activity                         | 3.828091798 | 0.056103994 |
| <b>N-methyltransferase activity</b>                                      | 5.644588684 | 0.027336317 | ubiquitin-like protein ligase activity                     | 2.900703439 | 0.036162688 |
| <b>histone methyltransferase activity</b>                                | 5.487794553 | 0.027336317 | ubiquitin protein ligase activity                          | 2.79579738  | 0.053706088 |
| protein-lysine N-methyltransferase activity                              | 5.127939173 | 0.025194751 | methyltransferase activity                                 | 2.675548031 | 0.056103994 |
| lysine N-methyltransferase activity                                      | 5.045230477 | 0.02396898  | actin binding                                              | 2.390259048 | 0.025695811 |
|                                                                          |             |             |                                                            |             |             |
| Cellular Component                                                       |             |             |                                                            |             |             |
| <i>Total Background</i>                                                  |             |             | <i>Heart Background</i>                                    |             |             |
| Description                                                              | Enrichment  | FDR         | Description                                                | Enrichment  | FDR         |
| nuclear cyclin-dependent protein kinase holoenzyme complex               | 13.3280303  | 8.40E-05    | <b>histone methyltransferase complex</b>                   | 5.133592522 | 0.00202423  |
| nucleotide-excision repair complex                                       | 11.42402597 | 0.002434402 | <b>intercalated disc</b>                                   | 4.941082803 | 0.042315325 |
| TOR complex                                                              | 10.66242424 | 4.37E-04    | <b>transcription elongation factor complex</b>             | 4.941082803 | 0.042315325 |
| <b>intercalated disc</b>                                                 | 7.31734997  | 0.00388701  | intermediate filament cytoskeleton                         | 4.74343949  | 0.006477863 |
| A band                                                                   | 6.834887335 | 0.024715785 | methyltransferase complex                                  | 4.56099951  | 0.001702185 |
| sarcoplasmic reticulum membrane                                          | 6.834887335 | 0.024715785 | <b>Z disc</b>                                              | 4.468457491 | 0.001158629 |
| <b>transcription elongation factor complex</b>                           | 6.547102605 | 0.002108201 | I band                                                     | 4.462913499 | 0.001037425 |
| <b>histone methyltransferase complex</b>                                 | 6.058195592 | 0.045184833 | <b>cell-cell contact zone</b>                              | 4.256932876 | 0.042315325 |
| <b>cell-cell contact zone</b>                                            | 6.006999573 | 0.040413143 | fibrillar center                                           | 4.124729992 | 0.002632505 |
| <b>Z disc</b>                                                            | 5.544460606 | 0.030608911 | sarcomere                                                  | 3.720344698 | 0.001158629 |
|                                                                          |             |             |                                                            |             |             |
| Non-Failing                                                              |             |             |                                                            |             |             |
| Molecular Function                                                       |             |             |                                                            |             |             |
| <i>Total Background</i>                                                  |             |             | <i>Heart Background</i>                                    |             |             |
| Description                                                              | Enrichment  | FDR         | Description                                                | Enrichment  | FDR         |
| <b>GDP-dissociation inhibitor activity</b>                               | 11.07508306 | 0.019856925 | <b>GDP-dissociation inhibitor activity</b>                 | 9.331779332 | 0.142363324 |
| <b>mitogen-activated protein kinase kinase binding</b>                   | 11.07508306 | 0.063499893 | <b>mitogen-activated protein kinase kinase binding</b>     | 7.998667999 | 0.142363324 |
| <b>phosphatase regulator activity</b>                                    | 3.964376321 | 0.063499893 | protein phosphatase regulator activity                     | 3.612301677 | 0.142363324 |
| <b>unfolded protein binding</b>                                          | 3.613480489 | 0.056685902 | <b>phosphatase regulator activity</b>                      | 3.315237394 | 0.142363324 |
| <b>ubiquitin protein ligase binding</b>                                  | 2.739419837 | 0.019856925 | inorganic anion transmembrane transporter activity         | 3.25527186  | 0.142363324 |
| <b>ubiquitin-like protein ligase binding</b>                             | 2.731606056 | 0.019856925 | <b>unfolded protein binding</b>                            | 3.142333857 | 0.142363324 |
| DNA-binding transcription repressor activity, RNA polymerase II-specific | -2.46804285 | 0.056685902 | anion transmembrane transporter activity                   | 2.321564614 | 0.142363324 |
| cadherin binding                                                         | 2.461129568 | 0.063499893 | <b>ubiquitin protein ligase binding</b>                    | 2.128923041 | 0.142363324 |

|                                       |             |             |
|---------------------------------------|-------------|-------------|
| transcription coactivator activity    | 2.330674124 | 0.060469616 |
| <b>cell adhesion molecule binding</b> | 2.270623723 | 0.060469616 |

|                                              |             |             |
|----------------------------------------------|-------------|-------------|
| <b>ubiquitin-like protein ligase binding</b> | 2.122390245 | 0.142363324 |
| <b>cell adhesion molecule binding</b>        | 1.893404502 | 0.142363324 |

**Cellular Component**

**Total Background**

| Description                          | Enrichment  | FDR         |
|--------------------------------------|-------------|-------------|
| ribbon synapse                       | 14.46       | 0.003830351 |
| septin ring                          | 13.77142857 | 0.045335623 |
| septin complex                       | 13.77142857 | 0.026744475 |
| septin filament array                | 13.77142857 | 0.029053498 |
| septin cytoskeleton                  | 12.85333333 | 0.032081556 |
| cytoplasmic ubiquitin ligase complex | 12.05       | 0.006608115 |
| podosome                             | 6.426666667 | 0.005565724 |
| sarcoplasmic reticulum membrane      | 6.179487179 | 0.005565724 |
| cell cortex region                   | 6.025       | 0.005565724 |
| <b>sarcoplasmic reticulum</b>        | 5.670588235 | 0.023749091 |

**Heart Background**

| Description                      | Enrichment  | FDR         |
|----------------------------------|-------------|-------------|
| <b>sarcoplasmic reticulum</b>    | 4.82558196  | 0.014526763 |
| sarcoplasm                       | 4.688491564 | 0.011209474 |
| ruffle                           | 3.1460902   | 0.011209474 |
| cell cortex                      | 2.677308024 | 0.01116406  |
| focal adhesion                   | 2.644790113 | 5.46E-04    |
| cell-substrate adherens junction | 2.623910191 | 5.46E-04    |
| cell-substrate junction          | 2.610172441 | 5.46E-04    |
| myofibril                        | 2.560381918 | 0.047166377 |
| ubiquitin ligase complex         | 2.465660902 | 0.023420444 |
| coated vesicle                   | 2.434143113 | 0.04185038  |

## Supplemental Table 2

Gene ontology (GO) analysis of transcripts with enrichment determined by DESeq2 analysis in human failing or non-failing RNA samples. Red indicates an overlap in GO category when using either total transcriptome (left) or heart-specific transcriptome (right) as background.

| Failing                                                    |             |             | Heart Background                                           |             |             |
|------------------------------------------------------------|-------------|-------------|------------------------------------------------------------|-------------|-------------|
| Molecular Function                                         |             |             | Molecular Function                                         |             |             |
| Total Background                                           |             |             | Heart Background                                           |             |             |
| Description                                                | Enrichment  | FDR         | Description                                                | Enrichment  | FDR         |
| IgG binding                                                | 13.85075619 | 0.00383095  | <b>CCR chemokine receptor binding</b>                      | 12.20528455 | 5.14E-04    |
| retinol dehydrogenase activity                             | 10.15722121 | 0.00383095  | <b>immunoglobulin binding</b>                              | 12.20528455 | 0.002106891 |
| calcium-dependent phospholipase A2 activity                | 8.125776965 | 0.044059228 | <b>chemokine activity</b>                                  | 10.84914182 | 1.36E-04    |
| <b>immunoglobulin binding</b>                              | 7.94912964  | 0.010061398 | signaling pattern recognition receptor activity            | 9.764227642 | 0.018934778 |
| <b>C-C chemokine receptor activity</b>                     | 6.6242747   | 0.031563072 | pattern recognition receptor activity                      | 9.764227642 | 0.018934778 |
| <b>C-C chemokine binding</b>                               | 6.348263254 | 0.037510266 | <b>chemokine receptor binding</b>                          | 9.415505226 | 1.36E-04    |
| <b>G protein-coupled chemoattractant receptor activity</b> | 5.859935311 | 0.047137946 | <b>C-C chemokine receptor activity</b>                     | 9.153963415 | 0.022856009 |
| <b>chemokine receptor activity</b>                         | 5.859935311 | 0.047137946 | <b>C-C chemokine binding</b>                               | 9.153963415 | 0.022856009 |
| <b>chemokine binding</b>                                   | 5.713436929 | 0.026354439 | steroid dehydrogenase activity                             | 8.615494978 | 0.027625132 |
| <b>CCR chemokine receptor binding</b>                      | 5.613201193 | 0.013335332 | <b>G protein-coupled chemoattractant receptor activity</b> | 8.136856369 | 0.032086133 |
| <b>lipopolysaccharide binding</b>                          | 5.540302476 | 0.028918353 | <b>chemokine receptor activity</b>                         | 8.136856369 | 0.032086133 |
| <b>chemokine activity</b>                                  | 5.186666148 | 0.011076498 | <b>chemokine binding</b>                                   | 7.959968187 | 0.013410131 |
| <b>chemokine receptor binding</b>                          | 4.995354692 | 0.005287033 | <b>lipopolysaccharide binding</b>                          | 7.70860077  | 0.038781422 |
| <b>monocarboxylic acid binding</b>                         | 4.232175503 | 0.011076498 | oxidoreductase activity, acting on paired donors           | 7.323170732 | 0.046286896 |
| hormone activity                                           | 4.16706511  | 8.13E-04    | cysteine-type endopeptidase inhibitor activity             | 6.538545296 | 0.025013249 |
| <b>phospholipase activity</b>                              | 3.550096732 | 0.011076498 | neurotransmitter transporter activity                      | 6.313078217 | 0.02795871  |
| <b>protease binding</b>                                    | 3.440349118 | 0.009279644 | <b>monocarboxylic acid binding</b>                         | 5.695799458 | 0.009196299 |
| <b>G protein-coupled peptide receptor activity</b>         | 2.983239795 | 0.014772073 | <b>peptidase inhibitor activity</b>                        | 5.424570912 | 3.10E-04    |
| <b>cytokine activity</b>                                   | 2.948870673 | 0.00383095  | <b>cytokine activity</b>                                   | 5.230836237 | 5.97E-05    |
| <b>receptor ligand activity</b>                            | 2.864857263 | 4.15E-07    | <b>endopeptidase inhibitor activity</b>                    | 5.163774234 | 6.84E-04    |
| <b>peptide receptor activity</b>                           | 2.863109333 | 0.020604491 | <b>G protein-coupled peptide receptor activity</b>         | 5.015870364 | 0.001836075 |
| <b>serine-type endopeptidase activity</b>                  | 2.846254294 | 0.011076498 | <b>peptide receptor activity</b>                           | 4.882113821 | 0.002106891 |
| <b>peptidase inhibitor activity</b>                        | 2.818188543 | 0.013214652 | <b>protease binding</b>                                    | 4.857205077 | 3.57E-04    |
| <b>lipase activity</b>                                     | 2.81276895  | 0.044059228 | <b>endopeptidase regulator activity</b>                    | 4.738522238 | 0.001356562 |
| <b>endopeptidase inhibitor activity</b>                    | 2.75346358  | 0.020604491 | <b>phospholipase activity</b>                              | 4.641446238 | 0.006782431 |
| <b>carboxylic acid binding</b>                             | 2.728805697 | 0.011076498 | <b>peptidase regulator activity</b>                        | 4.344253824 | 4.88E-04    |
| serine-type peptidase activity                             | 2.688676202 | 0.011076498 | <b>lipase activity</b>                                     | 3.87697274  | 0.01821811  |
| <b>endopeptidase regulator activity</b>                    | 2.642051759 | 0.028115968 | <b>serine-type endopeptidase activity</b>                  | 3.78784693  | 0.018934778 |
| serine hydrolase activity                                  | 2.63697089  | 0.013214652 | heparin binding                                            | 3.692354991 | 0.005492297 |
| <b>peptidase regulator activity</b>                        | 2.599478413 | 0.013335332 | <b>cytokine receptor binding</b>                           | 3.446197991 | 0.001293049 |
| <b>organic acid binding</b>                                | 2.587216722 | 0.013432331 | G protein-coupled receptor activity                        | 3.406125922 | 3.10E-04    |
| <b>carbohydrate binding</b>                                | 2.539305302 | 0.009279644 | extracellular matrix structural constituent                | 3.356453252 | 0.016391357 |
| <b>cytokine receptor binding</b>                           | 2.224209023 | 0.031563072 | <b>carboxylic acid binding</b>                             | 3.254742547 | 0.013410131 |
| G protein-coupled receptor binding                         | 2.176547401 | 0.046601778 | glycosaminoglycan binding                                  | 3.164333032 | 0.007129216 |
| <b>metal ion transmembrane transporter activity</b>        | 1.939105867 | 0.029715598 | <b>organic acid binding</b>                                | 3.161080891 | 0.016391357 |
|                                                            |             |             | <b>receptor ligand activity</b>                            | 3.100535995 | 4.88E-04    |
|                                                            |             |             | receptor regulator activity                                | 2.983514002 | 4.88E-04    |
|                                                            |             |             | <b>carbohydrate binding</b>                                | 2.946103168 | 0.013092774 |
|                                                            |             |             | sulfur compound binding                                    | 2.921477686 | 0.009196299 |

|                                                     |             |             |
|-----------------------------------------------------|-------------|-------------|
| transmembrane signaling receptor activity           | 2.50995771  | 1.81E-04    |
| <b>metal ion transmembrane transporter activity</b> | 2.405421043 | 0.018575744 |

**Cellular Component**

*Total Background*

| Description                                      | Enrichment  | FDR         |
|--------------------------------------------------|-------------|-------------|
| Schmidt-Lanterman incisure                       | 15.99363636 | 0.002569004 |
| condensed chromosome outer kinetochore           | 14.66083333 | 0.003223793 |
| compact myelin                                   | 12.56642857 | 0.00484363  |
| paranode region of axon                          | 10.995625   | 0.030366378 |
| <b>pronucleus</b>                                | 10.34882353 | 0.008136334 |
| mitotic spindle midzone                          | 10.14980769 | 0.036841175 |
| endolysosome membrane                            | 9.424821429 | 0.042502114 |
| condensed nuclear chromosome kinetochore         | 9.424821429 | 0.042502114 |
| <b>spindle midzone</b>                           | 9.055220588 | 4.86E-04    |
| sperm midpiece                                   | 7.996818182 | 0.020660226 |
| Flemming body                                    | 7.854017857 | 0.006790793 |
| condensed nuclear chromosome, centromeric region | 7.330416667 | 0.027375611 |
| <b>DNA packaging complex</b>                     | 7.0372      | 9.97E-06    |
| <b>spindle microtubule</b>                       | 6.766538462 | 8.48E-04    |
| <b>nucleosome</b>                                | 6.564552239 | 1.42E-04    |
| <b>extracellular matrix component</b>            | 6.283214286 | 0.003223793 |
| <b>mitotic spindle</b>                           | 6.219747475 | 6.38E-06    |
| kinesin complex                                  | 5.809009434 | 0.004362119 |
| <b>condensed chromosome, centromeric region</b>  | 5.638782051 | 6.38E-06    |
| <b>condensed chromosome kinetochore</b>          | 5.4978125   | 4.72E-05    |
| <b>tertiary granule membrane</b>                 | 5.4978125   | 0.001375344 |
| <b>kinetochore</b>                               | 5.29112782  | 6.38E-06    |
| <b>intercellular bridge</b>                      | 5.218262712 | 0.006749471 |
| <b>specific granule membrane</b>                 | 4.833241758 | 0.001444025 |
| <b>collagen trimer</b>                           | 4.549913793 | 0.004095973 |
| <b>chromosome, centromeric region</b>            | 4.534278351 | 2.99E-06    |
| <b>specific granule</b>                          | 4.39825     | 5.00E-05    |
| <b>condensed chromosome</b>                      | 4.339080717 | 2.18E-06    |
| specific granule lumen                           | 4.256370968 | 0.036841175 |
| calcium channel complex                          | 4.123359375 | 0.040882808 |
| <b>external side of plasma membrane</b>          | 4.109091696 | 4.36E-07    |
| condensed nuclear chromosome                     | 3.958425    | 0.00764899  |
| <b>platelet alpha granule</b>                    | 3.866593407 | 0.016543166 |
| <b>spindle</b>                                   | 3.754603659 | 8.07E-07    |
| microvillus                                      | 3.70936747  | 0.036841175 |
| <b>midbody</b>                                   | 3.600906433 | 0.001380374 |
| microtubule associated complex                   | 3.566148649 | 0.0038969   |
| <b>filopodium</b>                                | 3.554141414 | 0.026908679 |
| <b>tertiary granule</b>                          | 3.507806748 | 0.00285657  |
| protein-DNA complex                              | 3.507806748 | 0.00285657  |
| primary lysosome                                 | 3.405096774 | 0.00484363  |

*Heart Background*

| Description                                     | Enrichment  | FDR         |
|-------------------------------------------------|-------------|-------------|
| <b>pronucleus</b>                               | 11.78727445 | 0.037133909 |
| <b>extracellular matrix component</b>           | 8.51303155  | 8.97E-04    |
| protein complex involved in cell adhesion       | 7.567139156 | 0.036800462 |
| <b>spindle midzone</b>                          | 7.296884186 | 0.039371251 |
| <b>collagen trimer</b>                          | 6.925856176 | 9.12E-04    |
| <b>DNA packaging complex</b>                    | 6.662372517 | 0.008278658 |
| <b>mitotic spindle</b>                          | 6.610118615 | 1.36E-04    |
| <b>nucleosome</b>                               | 6.548485808 | 0.022561192 |
| <b>tertiary granule membrane</b>                | 5.959122085 | 0.005447902 |
| <b>condensed chromosome, centromeric region</b> | 5.618600823 | 3.49E-04    |
| <b>specific granule membrane</b>                | 5.53859884  | 0.001504147 |
| <b>intercellular bridge</b>                     | 5.433849926 | 0.039371251 |
| <b>spindle microtubule</b>                      | 5.433849926 | 0.039371251 |
| <b>condensed chromosome kinetochore</b>         | 5.223905724 | 0.002022683 |
| <b>kinetochore</b>                              | 4.885739846 | 8.97E-04    |
| <b>external side of plasma membrane</b>         | 4.852427984 | 9.39E-06    |
| <b>platelet alpha granule</b>                   | 4.831720609 | 0.01509913  |
| <b>specific granule</b>                         | 4.709336602 | 3.49E-04    |
| <b>condensed chromosome</b>                     | 4.35325477  | 2.65E-04    |
| <b>filopodium</b>                               | 4.157527036 | 0.031379919 |
| <b>chromosome, centromeric region</b>           | 3.929091485 | 0.001307216 |
| <b>anchored component of membrane</b>           | 3.929091485 | 0.023250231 |
| <b>tertiary granule</b>                         | 3.811805172 | 0.008859895 |
| <b>secretory granule membrane</b>               | 3.588137265 | 4.33E-04    |
| <b>side of membrane</b>                         | 3.563594602 | 2.42E-05    |
| <b>collagen-containing extracellular matrix</b> | 3.429277727 | 3.49E-04    |
| <b>extracellular matrix</b>                     | 3.386399291 | 4.18E-05    |
| <b>spindle</b>                                  | 3.331186259 | 5.79E-04    |
| <b>membrane region</b>                          | 3.301632008 | 8.97E-04    |
| <b>membrane raft</b>                            | 3.192386831 | 0.001817495 |
| <b>membrane microdomain</b>                     | 3.179965093 | 0.001817495 |
| <b>midbody</b>                                  | 3.12723608  | 0.042743857 |
| <b>chromosomal region</b>                       | 2.898053294 | 0.004885586 |
| <b>secretory granule lumen</b>                  | 2.848226169 | 0.008278658 |
| <b>cytoplasmic vesicle lumen</b>                | 2.73633157  | 0.011217674 |
| <b>vesicle lumen</b>                            | 2.726593735 | 0.011217674 |
| <b>neuronal cell body</b>                       | 2.451753086 | 0.011217674 |
| dendrite                                        | 2.146142408 | 0.024958818 |
| dendritic tree                                  | 2.141643157 | 0.024958818 |
| cell body                                       | 2.133195841 | 0.039371251 |

|                                                 |             |             |
|-------------------------------------------------|-------------|-------------|
| azurophil granule                               | 3.405096774 | 0.00484363  |
| blood microparticle                             | 3.257962963 | 0.040882808 |
| <b>chromosomal region</b>                       | 3.189063444 | 4.72E-05    |
| spindle pole                                    | 3.182944079 | 0.011380729 |
| <b>anchored component of membrane</b>           | 3.160419162 | 0.00764899  |
| actin-based cell projection                     | 3.125659898 | 0.004154251 |
| <b>side of membrane</b>                         | 3.017510395 | 2.99E-06    |
| <b>secretory granule membrane</b>               | 3.00221843  | 6.08E-04    |
| cation channel complex                          | 2.811666667 | 0.008165178 |
| <b>collagen-containing extracellular matrix</b> | 2.763927596 | 5.69E-04    |
| <b>extracellular matrix</b>                     | 2.660231855 | 7.21E-05    |
| microtubule                                     | 2.625820896 | 7.65E-04    |
| <b>secretory granule lumen</b>                  | 2.611460938 | 0.0038969   |
| <b>membrane region</b>                          | 2.579220679 | 0.004154251 |
| <b>membrane raft</b>                            | 2.545610932 | 0.005730886 |
| <b>membrane microdomain</b>                     | 2.537451923 | 0.005808637 |
| <b>cytoplasmic vesicle lumen</b>                | 2.487105655 | 0.005541565 |
| <b>vesicle lumen</b>                            | 2.479725519 | 0.005601161 |
| apical plasma membrane                          | 2.404188103 | 0.012448612 |
| apical part of cell                             | 2.345733333 | 0.006920883 |
| ion channel complex                             | 2.345733333 | 0.021387383 |
| <b>neuronal cell body</b>                       | 2.171975309 | 0.006289736 |
| transmembrane transporter complex               | 2.171975309 | 0.040857813 |
| transporter complex                             | 2.119638554 | 0.047039298 |
| presynapse                                      | 1.912282609 | 0.043087311 |

| Non-Failing                                             |             |             |                                                 |             |             |  |
|---------------------------------------------------------|-------------|-------------|-------------------------------------------------|-------------|-------------|--|
| Molecular Function                                      |             |             |                                                 |             |             |  |
| <i>Total Background</i>                                 |             |             | <i>Heart Background</i>                         |             |             |  |
| Description                                             | Enrichment  | FDR         | Description                                     | Enrichment  | FDR         |  |
| oxygen carrier activity                                 | 22.33717502 | 8.07E-04    | neurotransmitter binding                        | 18.83921569 | 0.013710203 |  |
| oxygen binding                                          | 13.27466401 | 1.31E-04    | <b>hormone activity</b>                         | 13.08278867 | 0.012625751 |  |
| peroxidase activity                                     | 6.832547653 | 0.034533573 | <b>receptor ligand activity</b>                 | 5.697343454 | 0.001218168 |  |
| oxidoreductase activity, acting on peroxide as acceptor | 6.335635097 | 0.046651127 | receptor regulator activity                     | 5.233115468 | 0.001480638 |  |
| <b>hormone activity</b>                                 | 5.460198338 | 0.001334793 |                                                 |             |             |  |
| heme binding                                            | 4.537238676 | 0.014736548 |                                                 |             |             |  |
| tetrapyrrole binding                                    | 4.208453265 | 0.023679562 |                                                 |             |             |  |
| organic acid binding                                    | 4.109197291 | 0.001241668 |                                                 |             |             |  |
| <b>receptor ligand activity</b>                         | 2.978290003 | 8.07E-04    |                                                 |             |             |  |
|                                                         |             |             |                                                 |             |             |  |
| Cellular Component                                      |             |             |                                                 |             |             |  |
| <i>Total Background</i>                                 |             |             | <i>Heart Background</i>                         |             |             |  |
| Description                                             | Enrichment  | FDR         | Description                                     | Enrichment  | FDR         |  |
| haptoglobin-hemoglobin complex                          | 41.10514019 | 2.29E-05    | <b>excitatory synapse</b>                       | 17.95587703 | 0.016190821 |  |
| hemoglobin complex                                      | 37.36830926 | 2.29E-05    | <b>collagen-containing extracellular matrix</b> | 5.551728765 | 0.004129374 |  |

|                                                                      |             |             |
|----------------------------------------------------------------------|-------------|-------------|
| chylomicron                                                          | 20.55257009 | 0.012085148 |
| endocytic vesicle lumen                                              | 18.26895119 | 0.007331136 |
| axolemma                                                             | 16.44205607 | 0.019984942 |
| MHC class II protein complex                                         | 16.44205607 | 0.019984942 |
| MHC protein complex                                                  | 15.65910102 | 0.008360439 |
| integral component of luminal side of endoplasmic reticulum membrane | 13.15364486 | 0.010980077 |
| luminal side of endoplasmic reticulum membrane                       | 13.15364486 | 0.010980077 |
| very-low-density lipoprotein particle                                | 12.98057059 | 0.029604438 |
| triglyceride-rich plasma lipoprotein particle                        | 12.98057059 | 0.029604438 |
| connexin complex                                                     | 12.33154206 | 0.032025322 |
| high-density lipoprotein particle                                    | 9.485801582 | 0.049115497 |
| <b>excitatory synapse</b>                                            | 8.38880412  | 0.011759288 |
| clathrin-coated endocytic vesicle membrane                           | 7.473661852 | 0.032429239 |
| brush border membrane                                                | 6.57682243  | 0.042864891 |
| main axon                                                            | 5.957266694 | 0.029604438 |
| Golgi lumen                                                          | 5.872162884 | 0.010980077 |
| voltage-gated potassium channel complex                              | 5.542266093 | 0.020182481 |
| blood microparticle                                                  | 5.328444098 | 0.012085148 |
| axoneme                                                              | 5.047999672 | 0.015106419 |
| potassium channel complex                                            | 5.033282472 | 0.027678093 |
| ciliary plasm                                                        | 5.004104023 | 0.015309846 |
| clathrin-coated vesicle membrane                                     | 4.609922264 | 0.032429239 |
| perikaryon                                                           | 4.567237799 | 0.021428273 |
| <b>collagen-containing extracellular matrix</b>                      | 4.267746795 | 2.29E-05    |
| presynaptic membrane                                                 | 4.084982876 | 0.020706282 |
| extrinsic component of plasma membrane                               | 4.059766932 | 0.020863208 |
| cluster of actin-based cell projections                              | 4.024279459 | 0.032429239 |
| <b>extracellular matrix</b>                                          | 3.977916792 | 7.09E-06    |
| anchored component of membrane                                       | 3.938217024 | 0.023699673 |
| integral component of synaptic membrane                              | 3.736830926 | 0.040920057 |
| motile cilium                                                        | 3.694844062 | 0.029604438 |
| endocytic vesicle membrane                                           | 3.596699766 | 0.046223496 |
| endoplasmic reticulum lumen                                          | 3.492593611 | 0.008360439 |
| endocytic vesicle                                                    | 3.413575656 | 0.010980077 |
| cation channel complex                                               | 3.378504673 | 0.029604438 |
| plasma membrane bounded cell projection cytoplasm                    | 3.355521648 | 0.040920057 |
| exocytic vesicle                                                     | 3.338488543 | 0.041251013 |
| transmembrane transporter complex                                    | 3.298560632 | 0.010980077 |
| ion channel complex                                                  | 3.288411215 | 0.011759288 |
| transporter complex                                                  | 3.219077244 | 0.010980077 |
| cell projection membrane                                             | 3.190249686 | 0.011033765 |
| ciliary part                                                         | 3.176306287 | 0.004421696 |
| apical plasma membrane                                               | 3.17210085  | 0.014223692 |
| side of membrane                                                     | 2.905560845 | 0.008360439 |
| neuronal cell body                                                   | 2.875668244 | 0.008360439 |
| synaptic membrane                                                    | 2.867800478 | 0.011147619 |
| extrinsic component of membrane                                      | 2.864469699 | 0.040920057 |
| postsynaptic density                                                 | 2.861750266 | 0.032025322 |
| asymmetric synapse                                                   | 2.825978388 | 0.032429239 |

|                             |             |             |
|-----------------------------|-------------|-------------|
| <b>extracellular matrix</b> | 5.208196377 | 0.001972475 |
|-----------------------------|-------------|-------------|



|                             |             |             |
|-----------------------------|-------------|-------------|
| postsynaptic membrane       | 2.817174717 | 0.032429239 |
| presynapse                  | 2.723321917 | 0.011759288 |
| postsynaptic specialization | 2.659744365 | 0.042864891 |
| neuron to neuron synapse    | 2.651944528 | 0.042864891 |
| transport vesicle           | 2.637763007 | 0.034711754 |
| apical part of cell         | 2.630728972 | 0.03475938  |
| cell-cell junction          | 2.609850171 | 0.023699673 |
| glutamatergic synapse       | 2.583751669 | 0.049150762 |
| cytoplasmic region          | 2.402805689 | 0.034832686 |

### Supplemental Table 3

m6A peaks and transcript location determined by exomePeak analysis that are found to overlap between human failing and rat hypertrophic RNA samples.

| gene name | peak | description                                                                                  | hu_ensembl         | hu_chromosome | hu_start  | hu_end    | hu_location | rt_ensembl            | rt_chromosome | rt_start  | rt_end    | rt_location |
|-----------|------|----------------------------------------------------------------------------------------------|--------------------|---------------|-----------|-----------|-------------|-----------------------|---------------|-----------|-----------|-------------|
| ACIN1     | 1    | apoptotic chromatin condensation inducer 1 [Source:HGNC Symbol;Acc:HGNC:17066]               | ENSG00000100813.14 | chr14         | 23068102  | 23068552  | UTR3        | ENSRNOG00000013533.7  | chr15         | 33288731  | 33290445  | CDS         |
|           | 2    |                                                                                              |                    | chr14         | 23067443  | 23067773  | UTR3        |                       |               |           |           |             |
| ANKRD17   | 1    | ankyrin repeat domain 17 [Source:HGNC Symbol;Acc:HGNC:23575]                                 | ENSG00000132466.19 | chr4          | 73091752  | 73091963  | CDS         | ENSRNOG00000002940.7  | chr14         | 19377778  | 19378049  | CDS         |
| ATRX      | 1    | ATRX chromatin remodeler [Source:HGNC Symbol;Acc:HGNC:886]                                   | ENSG00000085224.22 | chrX          | 77682855  | 77683066  | CDS         | ENSRNOG000000056703.1 | chrX          | 76821797  | 76821858  | CDS         |
| BAZ1B     | 1    | bromodomain adjacent to zinc finger domain 1B [Source:HGNC Symbol;Acc:HGNC:961]              | ENSG00000009954.11 | chr7          | 73476948  | 73477008  | CDS         | ENSRNOG00000001453.7  | chr12         | 24482167  | 24486602  | CDS         |
|           | 2    |                                                                                              |                    | chr7          | 73477277  | 73477487  | CDS         |                       | chr12         | 24479826  | 24480666  | CDS         |
|           | 3    |                                                                                              |                    | chr7          | 73477785  | 73478354  | CDS         |                       |               |           |           |             |
| CLIP1     | 1    | CAP-Gly domain containing linker protein 1 [Source:HGNC Symbol;Acc:HGNC:10461]               | ENSG00000130779.20 | chr12         | 122322259 | 122322620 | CDS         | ENSRNOG00000001247.7  | chr12         | 38450296  | 38451602  | CDS         |
|           | 2    |                                                                                              |                    | chr12         | 122377689 | 122377840 | CDS         |                       |               |           |           |             |
| CRYBG3    | 1    | crystallin beta-gamma domain containing 3 [Source:HGNC Symbol;Acc:HGNC:34427]                | ENSG00000080200.10 | chr3          | 97876157  | 97876338  | CDS         | ENSRNOG00000001687.7  | chr11         | 42946275  | 42946485  | CDS         |
|           | 2    |                                                                                              |                    | chr3          | 97876577  | 97877058  | CDS         |                       |               |           |           |             |
| CTNND1    | 1    | catenin delta 1 [Source:HGNC Symbol;Acc:HGNC:2515]                                           | ENSG00000198561.14 | chr11         | 57801979  | 57802159  | CDS         | ENSRNOG000000030790.5 | chr3          | 72052839  | 72053049  | UTR5        |
| DDI2      | 1    | DNA damage inducible 1 homolog 2 [Source:HGNC Symbol;Acc:HGNC:24578]                         | ENSG00000197312.12 | chr1          | 15661605  | 15661876  | UTR3        | ENSRNOG00000012274.8  | chr5          | 160236524 | 160236944 | UTR3        |
| EFCAB14   | 1    | ELKS/RAB6-interacting/CAST family member 1 [Source:HGNC Symbol;Acc:HGNC:17072]               | ENSG00000159658.12 | chr1          | 46718665  | 46719114  | UTR5        | ENSRNOG00000010091.7  | chr5          | 134593546 | 134594293 | UTR5        |
| ERC1      | 1    | FAT atypical cadherin 1 [Source:HGNC Symbol;Acc:HGNC:3595]                                   | ENSG00000082805.20 | chr12         | 1028109   | 1028290   | CDS         | ENSRNOG00000009264.6  | chr4          | 152089175 | 152089566 | UTR3        |
| FAT1      | 1    | filamin binding LIM protein 1 [Source:HGNC Symbol;Acc:HGNC:24686]                            | ENSG00000083857.14 | chr4          | 186708786 | 186709717 | CDS         | ENSRNOG000000030954.5 | chr16         | 50400788  | 50400819  | CDS         |
|           | 2    |                                                                                              |                    |               |           |           |             |                       | chr16         | 50383594  | 50383895  | CDS         |
| FBLIM1    | 1    | FRY like transcription coactivator [Source:HGNC Symbol;Acc:HGNC:29127]                       | ENSG00000162458.13 | chr1          | 15784656  | 15784777  | CDS         | ENSRNOG00000011774.6  | chr5          | 160123973 | 160124182 | CDS         |
| FRYL      | 1    | FRY like transcription coactivator [Source:HGNC Symbol;Acc:HGNC:29127]                       | ENSG00000075539.15 | chr4          | 48498945  | 48499036  | UTR3        | ENSRNOG00000002248.8  | chr14         | 37717250  | 37717520  | CDS         |
| H6PD      | 1    | hexose-6-phosphate dehydrogenase/glucose 1-dehydrogenase [Source:HGNC Symbol;Acc:HGNC:4795]  | ENSG00000049239.12 | chr1          | 9270017   | 9270288   | UTR3        | ENSRNOG00000017523.5  | chr5          | 167016512 | 167016871 | CDS         |
| JPH2      | 1    | junctophilin 2 [Source:HGNC Symbol;Acc:HGNC:14202]                                           | ENSG00000149596.6  | chr20         | 44177402  | 44177821  | UTR3        | ENSRNOG000000008170.5 | chr3          | 159754701 | 159775643 | CDS         |
| KLHL24    | 1    | kelch like family member 24 [Source:HGNC Symbol;Acc:HGNC:25947]                              | ENSG00000114796.16 | chr3          | 183650915 | 183651215 | CDS         | ENSRNOG000000033372.5 | chr11         | 84633443  | 84633504  | CDS         |
|           | 2    |                                                                                              |                    | chr3          | 183635609 | 183636336 | UTR5        |                       |               |           |           |             |
| LEPROTL1  | 1    | leptin receptor overlapping transcript like 1 [Source:HGNC Symbol;Acc:HGNC:6555]             | ENSG00000104660.19 | chr8          | 30138272  | 30177208  | CDS         | ENSRNOG00000012601.7  | chr16         | 61758916  | 61769772  | CDS         |
| MAP1A     | 1    | microtubule associated protein 1A [Source:HGNC Symbol;Acc:HGNC:6835]                         | ENSG00000166963.13 | chr15         | 43521625  | 43521955  | CDS         | ENSRNOG00000014230.6  | chr3          | 113269228 | 113269558 | CDS         |
|           | 2    |                                                                                              |                    | chr15         | 43524743  | 43525074  | CDS         |                       |               |           |           |             |
| MFG8      | 1    | milk fat globule-EGF factor 8 protein [Source:HGNC Symbol;Acc:HGNC:7036]                     | ENSG00000140545.15 | chr15         | 88909943  | 88910483  | Intron      | ENSRNOG00000017510.8  | chr1          | 140845464 | 140845999 | CDS         |
| MGA       | 1    | MAX dimerization protein MGA [Source:HGNC Symbol;Acc:HGNC:14010]                             | ENSG00000174197.16 | chr15         | 41750105  | 41750585  | CDS         | ENSRNOG000000006378.8 | chr3          | 111714111 | 111714321 | UTR3        |
|           | 2    |                                                                                              |                    |               |           |           |             |                       | chr3          | 111759760 | 111759911 | CDS         |
| MON2      | 1    | MON2 homolog, regulator of endosome-to-Golgi trafficking [Source:HGNC Symbol;Acc:HGNC:29177] | ENSG00000061987.16 | chr12         | 62466936  | 62467207  | UTR5        | ENSRNOG00000004185.8  | chr7          | 66771000  | 66774839  | CDS         |
| NIPBL     | 1    | NIPBL cohesin loading factor [Source:HGNC Symbol;Acc:HGNC:28862]                             | ENSG00000164190.19 | chr5          | 36975902  | 36976323  | CDS         | ENSRNOG000000056907.1 | chr2          | 57509427  | 57510457  | CDS         |
| PCDHGB1   | 1    | protocadherin gamma subfamily B, 1 [Source:HGNC Symbol;Acc:HGNC:8708]                        | ENSG00000254221.2  | chr5          | 141350250 | 141350609 | CDS         | ENSRNOG000000042264.2 | chr18         | 30827160  | 30827457  | CDS         |
|           | 2    |                                                                                              |                    | chr1          | 172394080 | 172394350 | CDS         | ENSRNOG000000026497.4 | chr13         | 79886920  | 79888770  | CDS         |
| PLCE1     | 1    | phospholipase C epsilon 1 [Source:HGNC Symbol;Acc:HGNC:17175]                                | ENSG00000138193.15 | chr10         | 94031711  | 94032252  | CDS         | ENSRNOG00000014276.6  | chr1          | 257390173 | 257390474 | CDS         |
| RASAL2    | 1    | RAS protein activator like 2 [Source:HGNC Symbol;Acc:HGNC:9874]                              | ENSG00000075391.16 | chr1          | 178341514 | 178390126 | CDS         | ENSRNOG00000004917.7  | chr13         | 74812399  | 74812638  | CDS         |
| REST      | 1    | RE1 silencing transcription factor [Source:HGNC Symbol;Acc:HGNC:9966]                        | ENSG00000084093.17 | chr4          | 56931531  | 56932070  | CDS         | ENSRNOG00000002074.7  | chr14         | 33150147  | 33150297  | CDS         |
|           | 2    |                                                                                              |                    | chr4          | 56910693  | 56911172  | CDS         |                       |               |           |           |             |
| RNF26     | 1    | ring finger protein 26 [Source:HGNC Symbol;Acc:HGNC:14646]                                   | ENSG00000173456.5  | chr11         | 119334945 | 119335454 | CDS         | ENSRNOG00000007720.6  | chr8          | 48447468  | 48447885  | UTR3        |
| RPRD2     | 1    | regulation of nuclear pre-mRNA domain containing 2 [Source:HGNC Symbol;Acc:HGNC:29039]       | ENSG00000163125.15 | chr1          | 150472047 | 150472557 | CDS         | ENSRNOG000000054294.1 | chr2          | 197887026 | 197887983 | CDS         |
| SACS      | 1    | sacsin molecular chaperone [Source:HGNC Symbol;Acc:HGNC:10519]                               | ENSG00000151835.16 | chr13         | 23330114  | 23330625  | CDS         | ENSRNOG00000014509.8  | chr15         | 41458799  | 41459189  | UTR5        |
|           | 2    |                                                                                              |                    |               |           |           |             |                       | chr15         | 41527489  | 41527850  | CDS         |
|           | 3    |                                                                                              |                    |               |           |           |             |                       | chr15         | 41528838  | 41529289  | CDS         |
| SEC23IP   | 1    | SEC23 interacting protein [Source:HGNC Symbol;Acc:HGNC:17018]                                | ENSG00000107651.13 | chr10         | 119898485 | 119898696 | CDS         | ENSRNOG000000020411.6 | chr1          | 200167168 | 200175910 | CDS         |
| SF3B4     | 1    | splicing factor 3b subunit 4 [Source:HGNC Symbol;Acc:HGNC:10771]                             | ENSG00000143368.10 | chr1          | 149926597 | 149926777 | CDS         | ENSRNOG000000021181.5 | chr2          | 198314014 | 198314417 | CDS         |
| SUB1      | 1    | SUB1 regulator of transcription [Source:HGNC Symbol;Acc:HGNC:19985]                          | ENSG00000113387.12 | chr5          | 32591504  | 32591655  | CDS         | ENSRNOG000000050563.2 | chr2          | 62029817  | 62034628  | CDS         |
| THRAP3    | 1    | thyroid hormone receptor associated protein 3 [Source:HGNC Symbol;Acc:HGNC:22964]            | ENSG00000054118.15 | chr1          | 36286644  | 36286795  | CDS         | ENSRNOG00000009977.6  | chr5          | 144193441 | 144193681 | CDS         |
| TMF1      | 1    | TATA element modulatory factor 1 [Source:HGNC Symbol;Acc:HGNC:11870]                         | ENSG00000144747.17 | chr3          | 69044588  | 69047549  | CDS         | ENSRNOG000000056462.1 | chr4          | 129542166 | 129544387 | CDS         |
| TNIK      | 1    | TRAF2 and NCK interacting kinase [Source:HGNC Symbol;Acc:HGNC:30765]                         | ENSG00000154310.17 | chr3          | 171063507 | 171063898 | CDS         | ENSRNOG00000012422.7  | chr2          | 114299772 | 114317137 | CDS         |
| TULP4     | 1    | TUB like protein 4 [Source:HGNC Symbol;Acc:HGNC:15530]                                       | ENSG00000130338.13 | chr6          | 158312464 | 158312705 | UTR5        | ENSRNOG00000018012.7  | chr1          | 47122864  | 47123345  | CDS         |
|           | 2    |                                                                                              |                    | chr6          | 158312513 | 158312662 | UTR5        |                       |               |           |           |             |
| UMPS      | 1    | uridine monophosphate synthetase [Source:HGNC Symbol;Acc:HGNC:12563]                         | ENSG00000114491.14 | chr3          | 124737630 | 124738199 | CDS         | ENSRNOG00000001797.6  | chr11         | 70034138  | 70041367  | CDS         |

## Supplemental Table 4

Gene ontology (GO) analysis of transcripts with m<sup>6</sup>A peak enrichment determined by exomePeak analysis in rat hypertrophic or control RNA samples. Red indicates an overlap in GO category when using either total transcriptome (left) or heart-specific transcriptome (right) as background.

| Hypertrophic                                                                               |             |             |                                                                                            |             |             |
|--------------------------------------------------------------------------------------------|-------------|-------------|--------------------------------------------------------------------------------------------|-------------|-------------|
| Molecular Function                                                                         |             |             |                                                                                            |             |             |
| Total Background                                                                           |             |             | Heart Background                                                                           |             |             |
| Description                                                                                | Enrichment  | FDR         | Description                                                                                | Enrichment  | FDR         |
| <b>phosphatidic acid binding</b>                                                           | 9.917477618 | 1.30E-05    | <b>phosphatidic acid binding</b>                                                           | 7.783985102 | 0.518482093 |
| oxidoreductase activity                                                                    | 5.628838648 | 0.04658608  | histone kinase activity                                                                    | 6.368715084 | 0.797719437 |
| <b>transcription factor binding</b>                                                        | 2.75946553  | 0.058778444 | oxidoreductase activity                                                                    | 3.891992551 | 0.797719437 |
| transcription coregulator activity                                                         | 2.413690745 | 0.098134672 | <b>transcription factor binding</b>                                                        | 2.133681196 | 0.01007687  |
| <b>actin binding</b>                                                                       | 2.363843231 | 0.098134672 | <b>actin binding</b>                                                                       | 1.945996276 | 0.633831376 |
| <b>chromatin binding</b>                                                                   | 2.301801834 | 0.098134672 | <b>chromatin binding</b>                                                                   | 1.858460111 | 0.627842282 |
| ubiquitin-like protein transferase activity                                                | 2.161941488 | 0.14076141  | double-stranded DNA binding                                                                | 1.690639298 | 0.627842282 |
| ubiquitin-protein transferase activity                                                     | 2.107463994 | 0.222643825 | sequence-specific double-stranded DNA binding                                              | 1.685192651 | 0.633831376 |
| protein serine/threonine kinase activity                                                   | 2.016857069 | 0.307623313 | transcription regulatory region sequence-specific DNA binding                              | 1.667996808 | 0.797719437 |
| protein kinase activity                                                                    | 1.936674814 | 0.307623313 | RNA polymerase II regulatory region DNA binding                                            | 1.643539376 | 0.797719437 |
| Cellular Component                                                                         |             |             |                                                                                            |             |             |
| Total Background                                                                           |             |             | Heart Background                                                                           |             |             |
| Description                                                                                | Enrichment  | FDR         | Description                                                                                | Enrichment  | FDR         |
| lamellipodium                                                                              | 3.77179147  | 0.011660323 | fibrillar center                                                                           | 3.420223325 | 0.088890423 |
| <b>cell leading edge</b>                                                                   | 3.498473248 | 1.28E-04    | cytoplasmic ribonucleoprotein granule                                                      | 3.228329607 | 0.088890423 |
| mitochondrial membrane part                                                                | 3.324995235 | 0.004704933 | ribonucleoprotein granule                                                                  | 2.964193548 | 0.088890423 |
| <b>nuclear speck</b>                                                                       | 3.258204938 | 0.002706732 | <b>endosome membrane</b>                                                                   | 2.336310186 | 0.088890423 |
| <b>endosome membrane</b>                                                                   | 2.963033729 | 0.009199722 | <b>nuclear speck</b>                                                                       | 2.324857685 | 0.088890423 |
| mitochondrial envelope                                                                     | 2.737601711 | 1.28E-04    | <b>cell leading edge</b>                                                                   | 2.309761207 | 0.088890423 |
| axon part                                                                                  | 2.595034842 | 0.003368264 | <b>vesicle membrane</b>                                                                    | 2.243811849 | 0.088890423 |
| nuclear body                                                                               | 2.593496284 | 0.001533004 | cytoplasmic vesicle membrane                                                               | 2.232447024 | 0.088890423 |
| mitochondrial membrane                                                                     | 2.581761006 | 0.001485982 | cytoplasmic vesicle part                                                                   | 1.89491825  | 0.088890423 |
| <b>vesicle membrane</b>                                                                    | 2.558002469 | 0.011660323 | axon                                                                                       | 1.817370252 | 0.088890423 |
| Control                                                                                    |             |             |                                                                                            |             |             |
| Molecular Function                                                                         |             |             |                                                                                            |             |             |
| Total Background                                                                           |             |             | Heart Background                                                                           |             |             |
| Description                                                                                | Enrichment  | FDR         | Description                                                                                | Enrichment  | FDR         |
| <b>NADH dehydrogenase (ubiquinone) activity</b>                                            | 17.03074866 | 0.038485532 | <b>NADH dehydrogenase (ubiquinone) activity</b>                                            | 12.94117647 | 0.089478915 |
| <b>NADH dehydrogenase (quinone) activity</b>                                               | 17.03074866 | 0.038485532 | <b>NADH dehydrogenase (quinone) activity</b>                                               | 12.94117647 | 0.089478915 |
| fatty acid synthase activity                                                               | 17.03074866 | 0.574292389 | <b>bHLH transcription factor binding</b>                                                   | 10.84775087 | 0.336396432 |
| <b>NADH dehydrogenase activity</b>                                                         | 14.41063348 | 0.044294978 | <b>NADH dehydrogenase activity</b>                                                         | 10.69053708 | 0.108295035 |
| <b>oxidoreductase activity, acting on NAD(P)H, quinone or similar compound as acceptor</b> | 13.87690632 | 0.044294978 | <b>oxidoreductase activity, acting on NAD(P)H, quinone or similar compound as acceptor</b> | 10.24509804 | 0.108295035 |
| <b>bHLH transcription factor binding</b>                                                   | 13.38130252 | 0.19309006  | <b>E-box binding</b>                                                                       | 9.835294118 | 0.108295035 |
| <b>E-box binding</b>                                                                       | 10.40767974 | 0.095707591 | <b>oxidoreductase activity, acting on NAD(P)H</b>                                          | 4.639289678 | 1           |
| <b>oxidoreductase activity, acting on NAD(P)H</b>                                          | 5.947245565 | 0.496929356 | transferase activity, transferring acyl groups other than amino-acyl groups                | 2.711937716 | 1           |
| <b>phosphoric ester hydrolase activity</b>                                                 | 2.968387531 | 0.418296924 | phosphatase activity                                                                       | 2.501709986 | 1           |
| transcription factor binding                                                               | 2.74344696  | 0.095707591 | <b>phosphoric ester hydrolase activity</b>                                                 | 2.415874647 | 1           |
| Cellular Component                                                                         |             |             |                                                                                            |             |             |
| Total Background                                                                           |             |             | Heart Background                                                                           |             |             |
| Description                                                                                | Enrichment  | FDR         | Description                                                                                | Enrichment  | FDR         |
| <b>transcriptionally active chromatin</b>                                                  | 23.57601351 | 0.042966681 | <b>transcriptionally active chromatin</b>                                                  | 15.953125   | 0.116372712 |

|                                                |             |             |
|------------------------------------------------|-------------|-------------|
| apical dendrite                                | 17.96267696 | 0.066088586 |
| PML body                                       | 9.861861862 | 0.068577228 |
| RNA polymerase II transcription factor complex | 5.715397215 | 0.122655772 |
| centrosome                                     | 4.864891677 | 0.001758427 |
| nuclear speck                                  | 4.392619694 | 0.0650546   |
| ribosome                                       | 4.037482437 | 0.122655772 |
| nuclear body                                   | 4.000778051 | 0.00339585  |
| microtubule organizing center                  | 3.729538861 | 0.004967309 |
| mitochondrial membrane                         | 3.01334668  | 0.089554263 |

|                                           |             |             |
|-------------------------------------------|-------------|-------------|
| apical dendrite                           | 15.01470588 | 0.116372712 |
| PML body                                  | 7.241134752 | 0.222263568 |
| mitochondrial respiratory chain complex I | 6.898648649 | 0.388829065 |
| NADH dehydrogenase complex                | 6.898648649 | 0.388829065 |
| recycling endosome                        | 4.170751634 | 0.388829065 |
| centrosome                                | 3.58245614  | 0.075106605 |
| microtubule organizing center             | 2.843401885 | 0.116372712 |
| nuclear body                              | 2.779103853 | 0.116372712 |
| mitochondrial membrane                    | 2.412156357 | 0.388829065 |

## Supplemental Table 5

m<sup>6</sup>A peaks and transcript location determined by exomePeak analysis that are found to overlap between human non-failing and rat control RNA samples.

| gene name | peak | description                                                                         | hu_ensembl         | hu_chromosome | hu_start  | hu_end    | hu_location | rt_ensembl           | rt_chromosome | rt_start  | rt_end    | rt_location |
|-----------|------|-------------------------------------------------------------------------------------|--------------------|---------------|-----------|-----------|-------------|----------------------|---------------|-----------|-----------|-------------|
| ASPH      | 1    | aspartate beta-hydroxylase [Source:HGNC Symbol;Acc:HGNC:757]                        | ENSG00000198363.18 | chr8          | 61658846  | 61659296  | UTR3        | ENSRNOG00000007445.8 | chr5          | 22746016  | 22746526  | UTR3        |
| CEP85L    | 1    | centrosomal protein 85 like [Source:HGNC Symbol;Acc:HGNC:21638]                     | ENSG00000111860.14 | chr6          | 118465320 | 118469183 | CDS         | ENSRNOG00000000414.7 | chr20         | 34616020  | 34647036  | CDS         |
| CORO6     | 1    | coronin 6 [Source:HGNC Symbol;Acc:HGNC:21356]                                       | ENSG00000167549.18 | chr17         | 29615351  | 29615739  | UTR3        | ENSRNOG00000014496.7 | chr10         | 62691982  | 62692726  | UTR3        |
| DNAAF2    | 1    | dynein axonemal assembly factor 2 [Source:HGNC Symbol;Acc:HGNC:20188]               | ENSG00000165506.14 | chr14         | 49633703  | 49633973  | CDS         | ENSRNOG00000028155.6 | chr6          | 91481953  | 91489408  | CDS         |
| ITGB5     | 1    | integrin subunit beta 5 [Source:HGNC Symbol;Acc:HGNC:6160]                          | ENSG00000082781.12 | chr3          | 124887216 | 124887690 | UTR5        | ENSRNOG00000001795.8 | chr11         | 70057127  | 70062395  | CDS         |
| MEDAG     | 1    | mesenteric estrogen dependent adipogenesis [Source:HGNC Symbol;Acc:HGNC:25926]      | ENSG00000102802.10 | chr13         | 30924410  | 30924619  | CDS         | ENSRNOG00000000906.7 | chr12         | 6711746   | 6712339   | UTR3        |
| P3H3      | 1    | prolyl 3-hydroxylase 3 [Source:HGNC Symbol;Acc:HGNC:19318]                          | ENST00000290510.9  | chr12         | 6839309   | 6839847   | CDS         | ENSRNOG00000016071.6 | chr4          | 157363026 | 157363640 | CDS         |
|           | 2    |                                                                                     |                    | chr12         | 6839308   | 6839847   | Intron      |                      |               |           |           |             |
| PCSK7     | 1    | proprotein convertase subtilisin/kexin type 7 [Source:HGNC Symbol;Acc:HGNC:8748]    | ENSG00000160613.13 | chr11         | 117205776 | 117206137 | CDS         | ENSRNOG00000017478.5 | chr8          | 50221556  | 50222183  | CDS         |
| SON       | 1    | SON DNA binding protein [Source:HGNC Symbol;Acc:HGNC:11183]                         | ENSG00000159140.21 | chr21         | 33553014  | 33553255  | CDS         | ENSRNOG00000002021.8 | chr11         | 31812680  | 31812831  | CDS         |
|           | 2    |                                                                                     |                    | chr21         | 33553733  | 33554123  | CDS         |                      |               |           |           |             |
|           | 3    |                                                                                     |                    | chr21         | 33551218  | 33551968  | CDS         |                      |               |           |           |             |
| UNC13B    | 1    | unc-13 homolog B [Source:HGNC Symbol;Acc:HGNC:12566]                                | ENSG00000198722.14 | chr9          | 35404229  | 35404319  | UTR3        | ENSRNOG00000008237.8 | chr5          | 58714855  | 58715126  | UTR3        |
| XPR1      | 1    | xenotropic and polytropic retrovirus receptor 1 [Source:HGNC Symbol;Acc:HGNC:12827] | ENSG00000143324.14 | chr1          | 180632021 | 180632261 | CDS         | ENSRNOG00000000042.7 | chr13         | 72918489  | 72920930  | CDS         |
